# Supplementary material for: Self-crosslinked N-doped carbon dot supported Pd as an efficient catalyst for dehydrogenation of formic acid at room temperature
Source: Royal Society of Chemistry journal article supplement (doi:10.1039/d3se00407d), 2023-01-01
Supplement: d3se00407d1.pdf [file d3se00407d1.pdf]

**Supporting Information for**

**Self-crosslinked N-doped Carbon Dots Supported Pd  
as Efficient Catalyst for Dehydrogenation of Formic  
Acid at Room Temperature**

Zhongxuan Lin<sup>a #</sup>, Ouyang Liu<sup>a #</sup>, Shuyan Guan<sup>a</sup>, Zhao xinru<sup>a</sup>, Zhenluo Yuan<sup>a</sup>, Xianyun Liu<sup>a, \*</sup>,  
Linyan Bian<sup>a</sup>, Yanping Fan<sup>a,c</sup>, Qiuming Peng<sup>b</sup>, Shumin Han<sup>b</sup>, Baozhong Liu<sup>a, c, \*</sup>

<sup>a</sup>College of Chemistry and Chemical Engineering, Henan Polytechnic University,  
Jiaozuo, Henan 454003, P. R. China

<sup>b</sup>State Key Laboratory of Metastable Materials Science and Technology, Yanshan  
University, Qinhuangdao 066004, P.R. China

<sup>c</sup>Henan Key Laboratory of Coal Green Conversion, Henan Polytechnic University,  
Jiaozuo, Henan 454003, P. R. China

# These authors contributed equally to this work.

\* **Corresponding Author:** xianyunliu@hpu.edu.cn, HPULiuking@163.com

## Computational methods

We have employed the Vienna Ab Initio Package (VASP)<sup>1,2</sup> to perform all the density functional theory (DFT) calculations within the generalized gradient approximation (GGA) using the PBE<sup>3</sup> formulation. We have chosen the projected augmented wave (PAW) potentials<sup>4-6</sup> to describe the ionic cores and take valence electrons into account using a plane wave basis set with a kinetic energy cutoff of 450 eV. Partial occupancies of the Kohn–Sham orbitals were allowed using the Gaussian smearing method and a width of 0.05 eV. The electronic energy was considered self-consistent when the energy change was smaller than  $10^{-6}$  eV. A geometry optimization was considered convergent when the force change was smaller than 0.03 eV/Å. Grimme’s DFT-D3 methodology<sup>7</sup> was used to describe the dispersion interactions. The vacuum spacing perpendicular to the plane of the structure is 15 Å. The Brillouin zone integral uses the surfaces structures of  $2\times 2\times 1$  monkhorst pack K point sampling. Finally, the adsorption energies ( $E_{ads}$ ) are calculated as  $E_{ads} = E_{ad/sub} - E_{ad} - E_{sub}$ , where  $E_{ad/sub}$ ,  $E_{ad}$  and  $E_{sub}$  are the optimized adsorbate / substrate system, the adsorbate in the structure and the clean substrate respectively. The free energy is calculated as follows:

$$G = E + ZPE - TS$$

where  $G$ ,  $E$ ,  $ZPE$  and  $TS$  are the free energy, total energy from DFT calculations, zero point energy and entropic contributions, respectively.

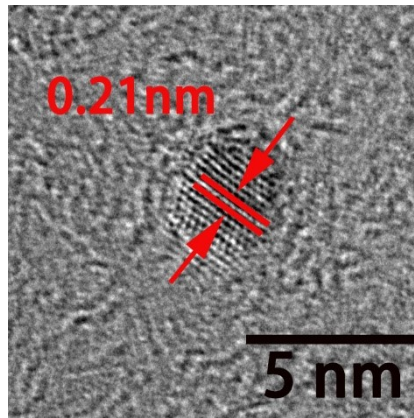

**Figure S1** HRTEM images of CE-CDs-III

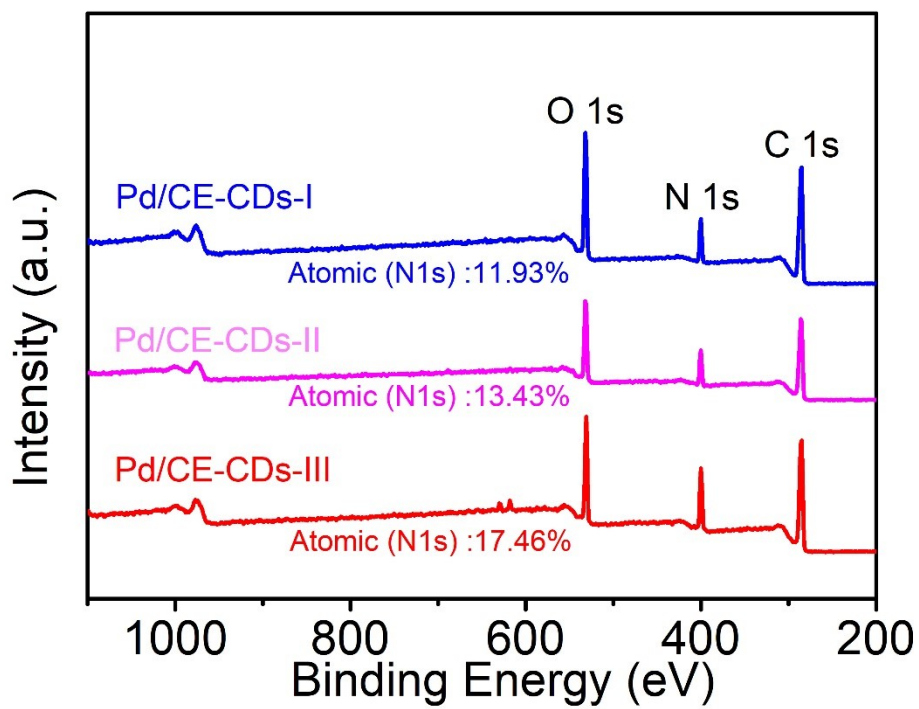

**Figure S2** Total spectrum of CE-CDs-X

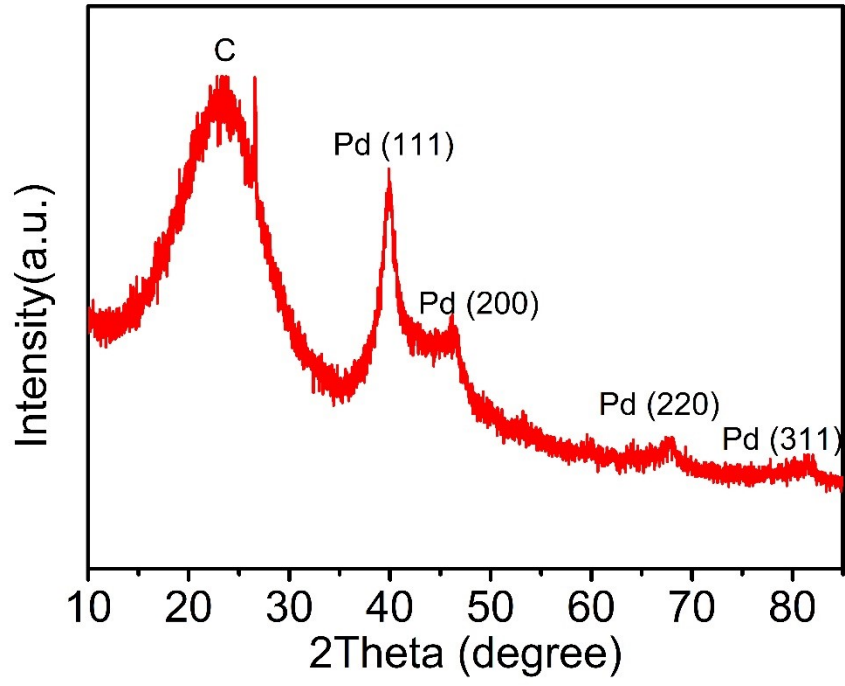

**Figure S3** the XRD of Pd/XC-72 sample.

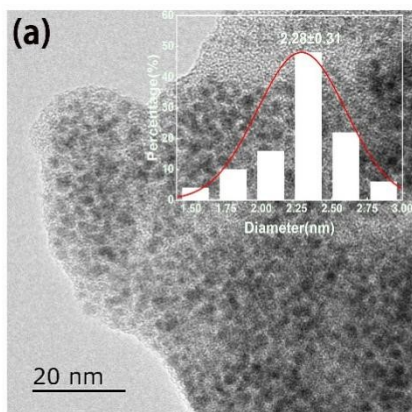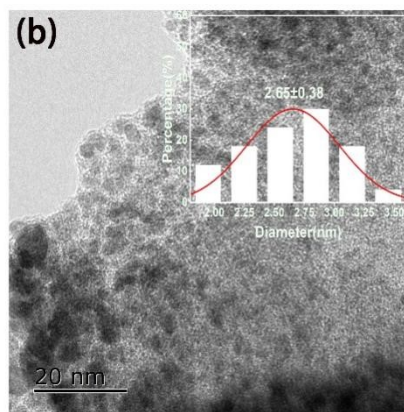

**Figure S4** TEM images of Pd/CE-CDs-I (a), Pd/CE-CDs-II (b)

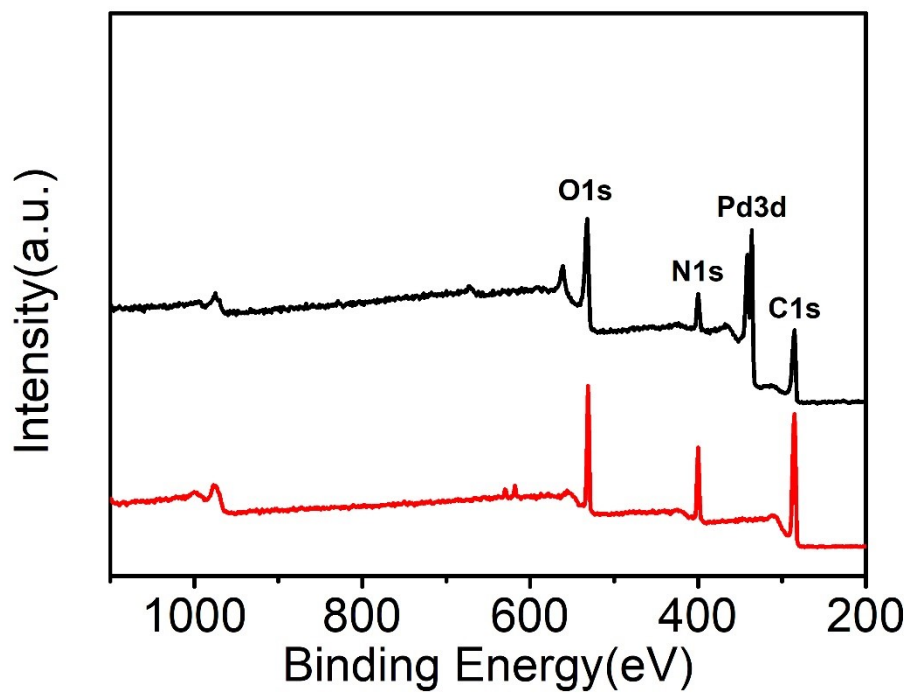

**Figure S5** Total spectrum of CE-CDs-III and Pd/CE-CDs-III

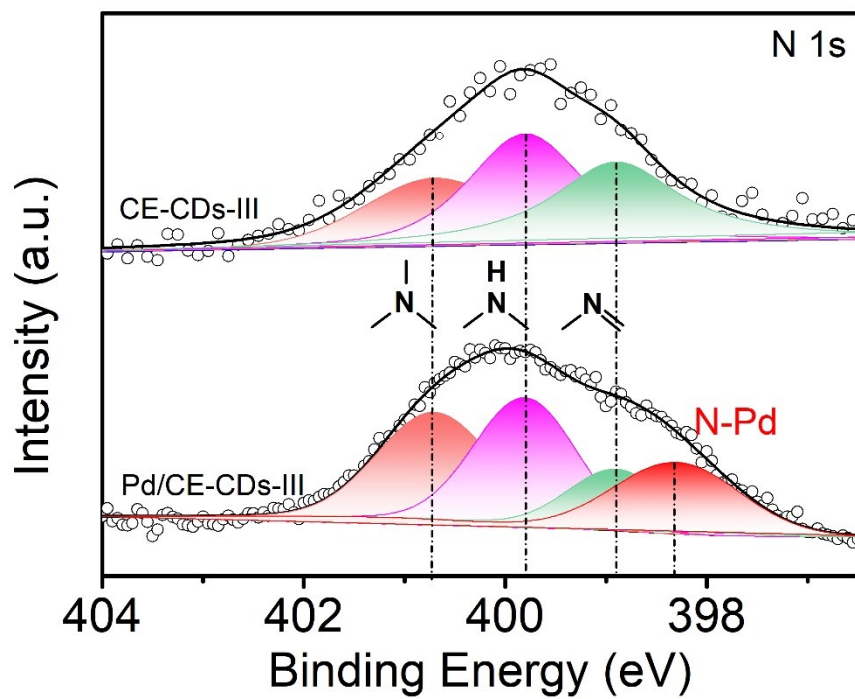

**Figure S6** the N 1s peak of CE-CDs-III and Pd/CE-CDs-III



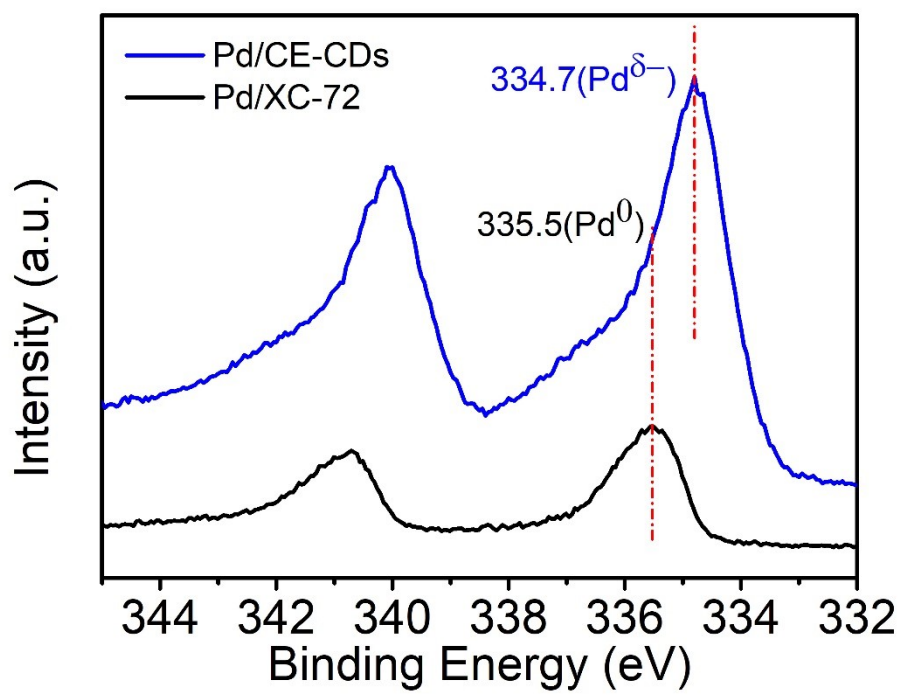

Figure S7 the Pd3d peak of Pd/CE-CDs-III and Pd/XC-72

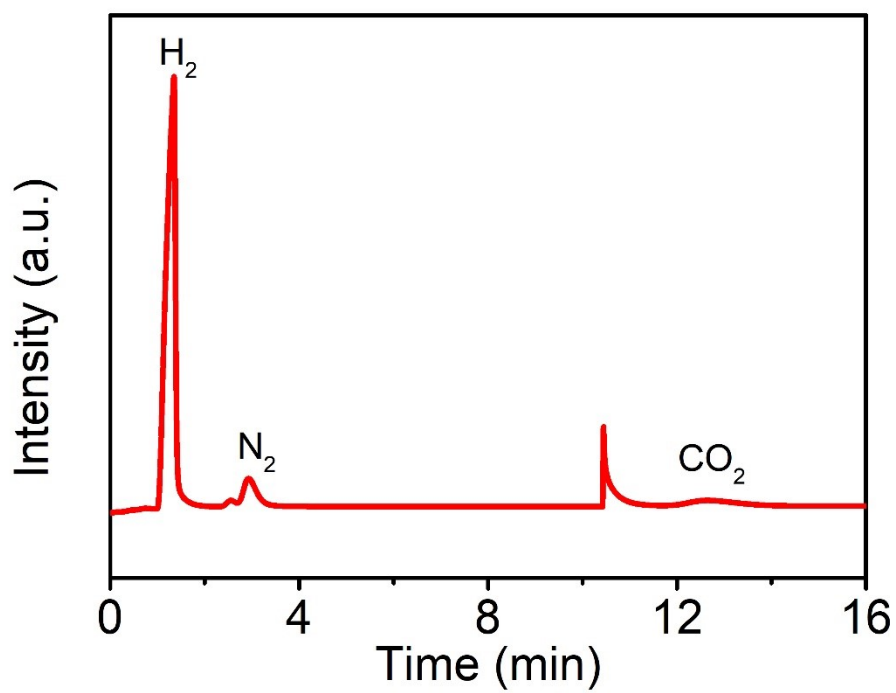

**Figure S8** The effluent composition of FA dehydrogenation reaction analyzed by gas chromatography

**Table S1:** Catalytic activity of various catalysts for FA dehydrogenation (TOF values taken directly from related studies)

| <b>Catalyst</b>                                        | <b>Reagent</b> | <b>Temp. (K)</b> | <b>TOF<sub>initial</sub> (h<sup>-1</sup>)</b> | <b>Average Size(nm)</b> | <b>Ref.</b> |
|--------------------------------------------------------|----------------|------------------|-----------------------------------------------|-------------------------|-------------|
| Pd-MnO <sub>x</sub> /SiO <sub>2</sub> -NH <sub>2</sub> | FA             | 298              | 140                                           | 4.6±1.2                 | [7]         |
| Pd/C                                                   | FA             | 303              | 48                                            | 1.8-3.5                 | [8]         |
| PdAu/HPC-NH <sub>2</sub>                               | FA             | 298              | 3763                                          | 2                       | [9]         |
| Pd/C                                                   | FA             | 303              | 6.9                                           | 3-4                     | [10]        |
| Pd/C-NaBH <sub>4</sub>                                 | FA/SF=11/8     | 303              | 304                                           | 2.2                     | [11]        |
| Pd-NH <sub>2</sub> /MIL-125                            | FA/SF=9.8/7.9  | 305              | 214                                           | 3.1                     | [12]        |
| Pd/NHPC-NH <sub>2</sub>                                | FA             | 298              | 3798                                          | 2.5                     | [13]        |
| Pd@SiO <sub>2</sub>                                    | FA/SF=3:1      | 365              | 70                                            | 20-35                   | [14]        |
| Pd-N-SiO <sub>2</sub>                                  | FA/SF=9/1      | 358              | 115                                           | -                       | [15]        |
| NiPd/NH <sub>2</sub> -N-rGO                            | FA             | 298              | 954                                           | 10.2                    | [16]        |
| Pd/MS-C-30                                             | FA/SF=1/1      | 298              | 750                                           | 2.3                     | [17]        |
| Pd@CN                                                  | FA             | 288              | 71                                            | 2.5                     | [18]        |
| Methanol mediated Pd NPs/ Vulcan XC-72R                | FA/SF=1/1      | 303              | 1678                                          | 1.4                     | [19]        |
| Pd@CN900K                                              | FA/SF=1/3      | 298              | 1963                                          | 1.1±0.2                 | [20]        |
| Pd/CE-CDs-III                                          | FA             | 298              | 256                                           | 1.94±0.16               | This work   |

**Table S2** The content of Pd and N elements were obtained by XPS.

| Sample                      | Pd content | N content |
|-----------------------------|------------|-----------|
| Pd/CDs-III                  | 7.14%      | 13.57%    |
| Pd/CDs-III after five tests | 7.11%      | 11.41%    |

## REFERENCES

- [1] Kresse, G.; Furthmüller, J. Efficient iterative schemes for Ab initio total-energy calculations using a plane-wave basis set. *Phys. Rev. B* 1996, **54**, 11169-11186.
- [2] Perdew, J. P.; Burke, K.; Ernzerhof, M. Generalized gradient approximation made simple. *Phys. Rev. Lett.* 1996, **77**, 3865-3868.
- [3] Kresse, G.; Joubert, D. From ultrasoft pseudopotentials to the projector augmented-wave method. *Phys. Rev. B* 1999, **59**, 1758-1775.
- [4] Blöchl, P. E. Projector augmented-wave method. *Phys. Rev. B* 1994, **50**, 17953-17979.
- [5] Grimme, S.; Antony, J.; Ehrlich, S.; Krieg, H. A consistent and accurate ab initio parametrization of density functional dispersion correction (DFT-D) for the 94 elements H-Pu *J. Chem. Phys.* 2010, **132**, 154104.
- [6] Henkelman, G.; Uberuaga, B. P.; Jonsson, H. A climbing image nudged elastic band method for finding saddle points and minimum energy paths. *J. Chem. Phys.* 2000, **113**, 9901-9904.
- [7] Bulut, A.; Yurderi, M.; Karatas, Y.; Zahmkiran, M.; Kivrak, H.; Gulcan, M.; Kaya, M. Pd-MnO nanoparticles dispersed on amine-grafted silica: highly efficient nanocatalyst for hydrogen production from additive-free dehydrogenation of formic acid under mild conditions. *Appl. Catal. B* 2015, **164**, 324-333.
- [8] Hu, C.; Pulleri, J K.; Ting, S.; Chan, K. Activity of Pd/C for hydrogen generation in aqueous formic acid solution. *Int. J. Hydrogen Energy* 2014, **39** (1), 381-390.
- [9] Wang, Z.; Liang, S.; Meng, X.; Mao, S.; Lian, X.; Wang, Y. Ultrasmall PdAu alloy nanoparticles anchored on amine-functionalized hierarchically porous carbon as

additive-free catalysts for highly efficient dehydrogenation of formic acid. *Appl. Catal. B-Environ.* 2021, **291**, 120140.

[10] Wang, X.; Qi, G.-W.; Tan, C.-H.; Li, Y.-P.; Guo, J.; Pang, X.-J.; Zhang, S.-Y. Pd/C nanocatalyst with high turnover frequency for hydrogen generation from the formic acid-formate mixtures. *Int. J. Hydrogen Energy* 2014, **39** (2), 837-843.

[11] Jiang, K.; Xu, K.; Zou, S.; Cai, W.-B. B-Doped Pd catalyst: Boosting room-temperature hydrogen production from formic acid-formate solutions. *J. Am. Chem. Soc.* 2014, **136** (13), 4861-4864.

[12] Martis, M.; Mori, K.; Fujiwara, K.; Ahn, W.-S.; Yamashita, H. Amine-Functionalized MIL-125 with imbedded palladium nanoparticles as an efficient catalyst for dehydrogenation of formic acid at ambient temperature. *The Journal of Physical Chemistry C* 2013, **117** (44), 22805-22810.

[13] Wang, Z.; Wang, C.; Mao, S.; Gong, Y.; Chen, Y.; Wang, Y. Pd nanoparticles anchored on amino-functionalized hierarchically porous carbon for efficient dehydrogenation of formic acid under ambient conditions. *J. Mater. Chem. A* 2019, **7**, 25791-25795.

[14] Yadav, M.; Singh, A.K.; Tsumori, N.; Xu, Q. Palladium silica nanosphere-catalyzed decomposition of formic acid for chemical hydrogen storage. *Journal of Materials Chemistry* 2012, **22** (36), 19146-19150.

[15] Zhao, Y.; Deng, L.; Tang, S.-Y.; Lai, D.-M.; Liao, B.; Fu, Y.; Guo, Q.-X. Selective decomposition of formic acid over immobilized catalysts. *Energy & Fuels* 2011, **25** (8), 3693-3697.

- [16] Yan, J.-M.; Li, S.-J.; Yi, S.-S.; Wulan, B.-R.; Zheng, W.-T.; Jiang, Q. Anchoring and Upgrading Ultrafine NiPd on Room-Temperature-Synthesized Bifunctional NH<sub>2</sub>-N-rGO toward Low-Cost and Highly Efficient Catalysts for Selective Formic Acid Dehydrogenation. *Adv. Mater.* 2018, **30**, 1703038.
- [17] Zhu, Q.-L.; Tsumori, N.; Xu, Q. Sodium hydroxide-assisted growth of uniform Pd nanoparticles on nanoporous carbon MSC-30 for efficient and complete dehydrogenation of formic acid under ambient conditions. *Chemical Science* 2013, **5** (1), 195-199.
- [18] Cai, Y.-Y.; Li, X.-H.; Zhang, Y.-N.; Wei, X.; Wang, K.-X.; Chen, J.-S. Highly efficient dehydrogenation of formic acid over a palladium-nanoparticle-based mott-schottky photocatalyst. *Angew. Chem. Int. Ed.* 2013, **52** (45), 11822-11825.
- [19] Zhu, Q.-L.; Tsumori, N.; Xu, Q. Immobilizing extremely catalytically active palladium nanoparticles to carbon nanospheres: a weakly-capping growth approach. *J. Am. Chem. Soc.* 2015, **137** (36), 11743-11748.
- [20] Wang, Q.; Tsumori, N.; Kitta, M.; Xu, Q. Fast dehydrogenation of formic acid over palladium nanoparticles immobilized in nitrogen-doped hierarchically porous carbon. *ACS Catal.* 2018, **8** (12), 12041-12045.
